# Supplementary material for: Balancing the antibacterial and osteogenic effects of double-layer TiO2 nanotubes loaded with silver nanoparticles for the osseointegration of implants
Source: Royal Society of Chemistry journal article supplement (doi:10.1039/d2nr06154f), 2022-12-29
Supplement: d2nr06154f1.pdf [file d2nr06154f1.pdf]

## Supplementary Materials for

### **Balancing Antibacterial and Osteogenic Effects of Double-layer TiO<sub>2</sub> Nanotubes Loaded with Silver Nanoparticles for Osseointegration of Implants**

Lei Sun<sup>1,2†</sup>, Xuzhuo Chen<sup>2†</sup>, Ruiguo Chen<sup>3</sup>, Zhibo Ji<sup>1</sup>, Haizhang Mu<sup>2</sup>, Chun Liu<sup>1</sup>, Jinlan Yu<sup>1</sup>,  
Jiarong Wang<sup>3</sup>, Rong Xia<sup>1</sup>, Shanyong Zhang<sup>2</sup>, Yin Xu<sup>4\*</sup>, Kun Ma<sup>3\*</sup>, Lunguo Xia<sup>5\*</sup>

<sup>1</sup>Department of Stomatology, The Second Affiliated Hospital of Anhui Medical University, Hefei, Anhui, China.

<sup>2</sup>Department of Oral Surgery, Ninth People's Hospital, College of Stomatology, Shanghai Jiao Tong University School of Medicine; Shanghai Key Laboratory of Stomatology & Shanghai Research Institute of Stomatology, National Clinical Research Center of Stomatology. Shanghai, China.

<sup>3</sup>High Magnetic Field Laboratory, CAS Key Laboratory of High Magnetic Field and Ion Beam Physical Biology, Hefei Institutes of Physical Science, Chinese Academy of Sciences, Hefei, Anhui, China.

<sup>4</sup>Laboratory of Molecular Neuropsychiatry, School of Mental Health and Psychological Sciences, Anhui Medical University, Hefei, Anhui, China.

<sup>5</sup>Department of Orthodontics, Ninth People's Hospital, Collage of Stomatology, Shanghai Jiao Tong University School of Medicine, Shanghai, China.

\*Corresponding authors.

Email: xialunguo@hotmail.com (L.Xia);

makun@hmfl.ac.cn (K. Ma);

xuyin@ahmu.edu.cn (Y. Xu)

†These authors contributed equally to this work.

**This PDF file includes:**

Figs. S1 to S8

Table S1.

**Fig. S1.** Images of the titanium disc and rod.

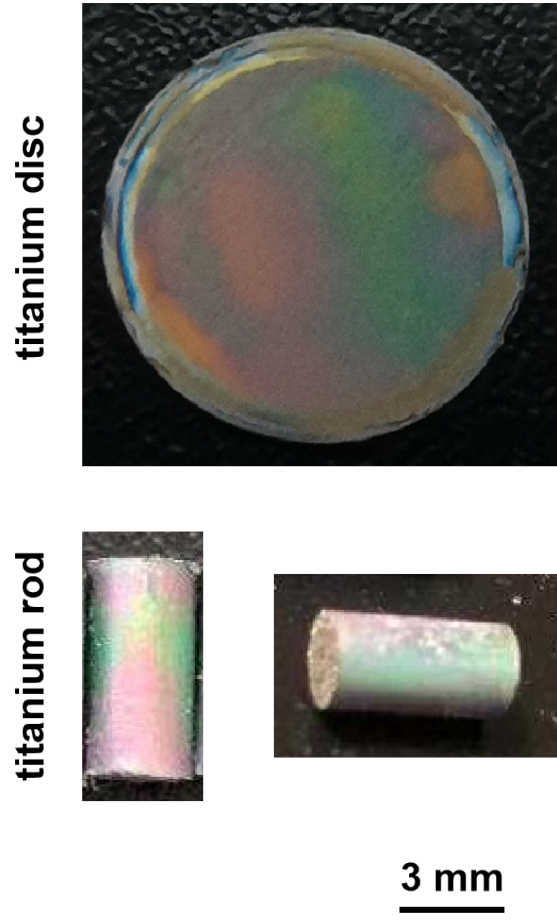

**Fig. S2.** The SEM images of the titanium rods of DNT.

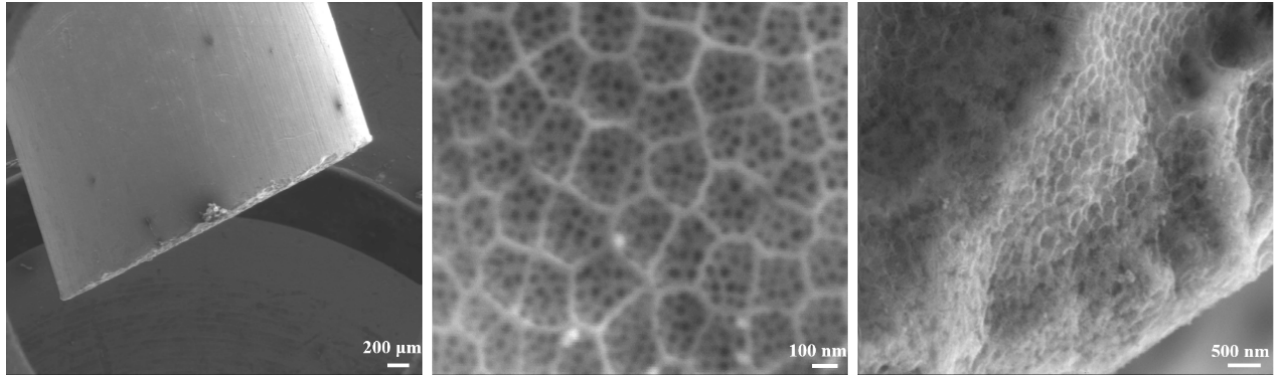

**Fig. S3.** The average diameter of Ag particles that were loaded onto the DNT-Ag.

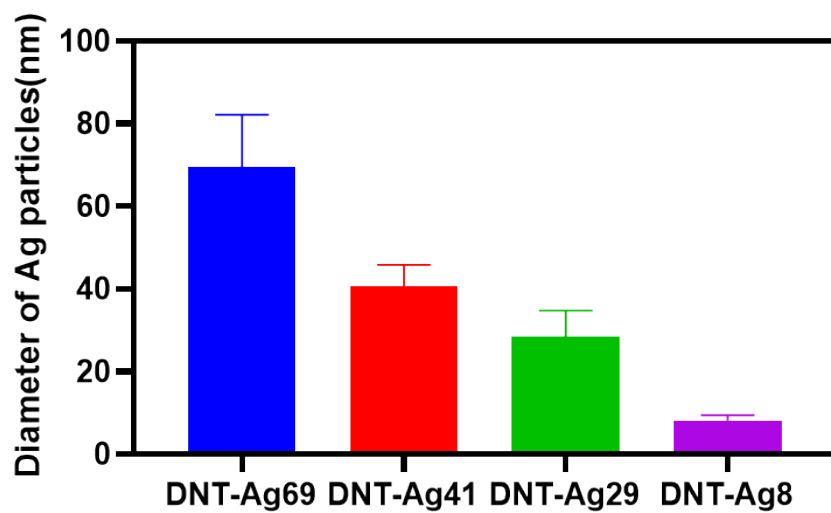

**Fig. S4.** Silver ion release (ppm) from the exposed surface of the DNT-Ag samples over time when incubated in 5 mL of water.

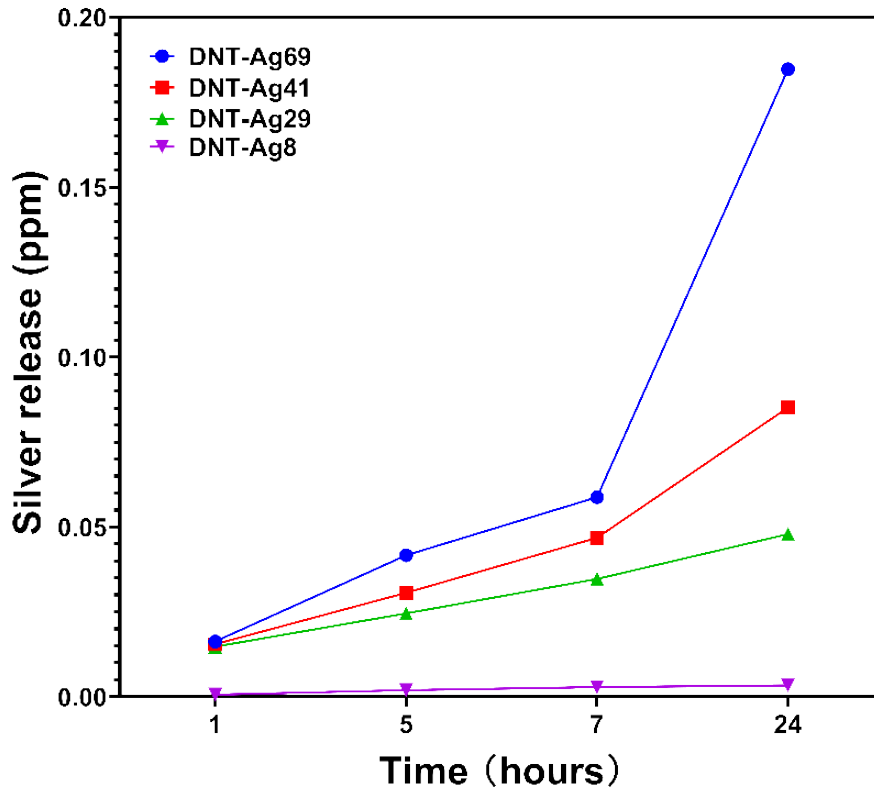

**Fig. S5.** The relative cellular viability of rBMSCs attached to the surface of DNT and DNT-Ag. Data are presented as the mean  $\pm$  SD. \* $P < 0.05$ ; \*\*\* $P < 0.001$ .

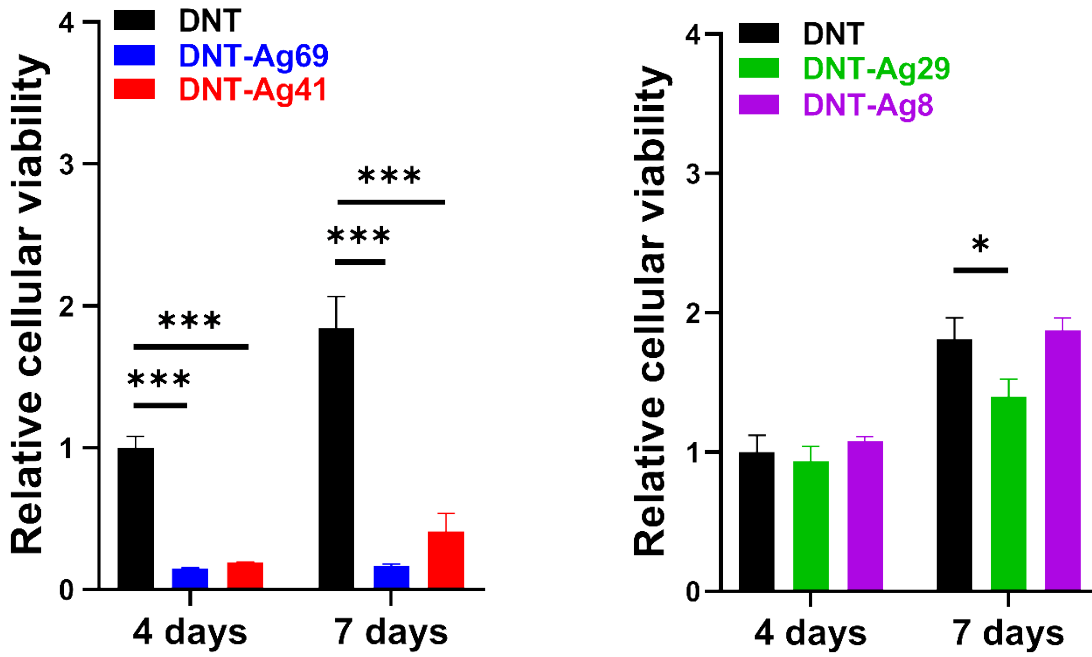

**Fig. S6.** EDS mapping images of the DNT and DNT-Ag8 [Ti (yellow), O (green), F (blue), C (red) and Ag (purple)].

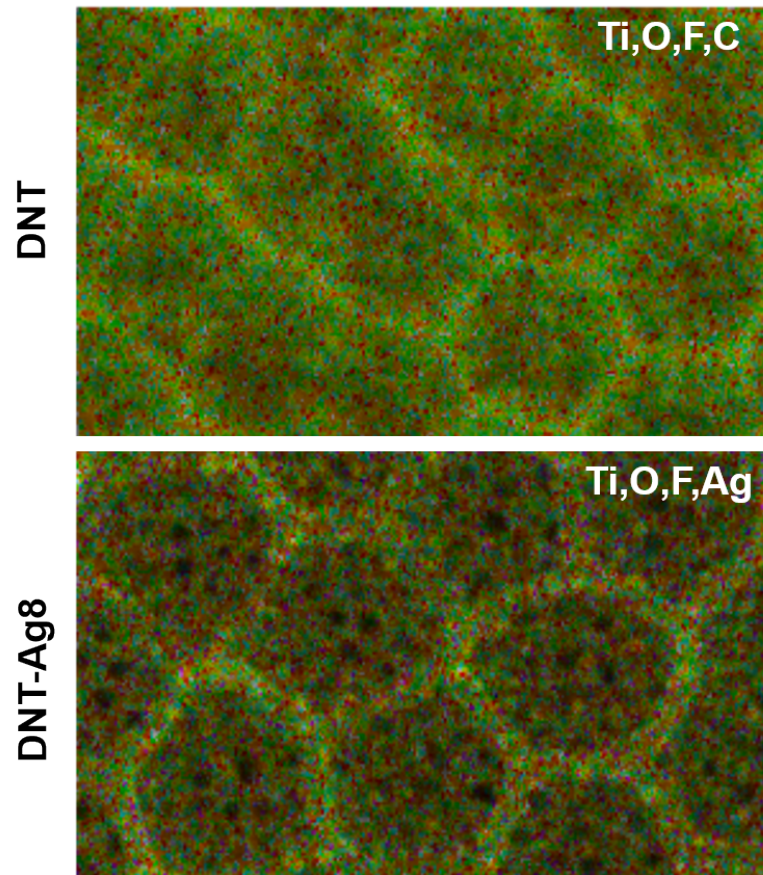



**Fig. S7.** The full-scale XPS patterns for DNT and DNT-Ag8 samples.

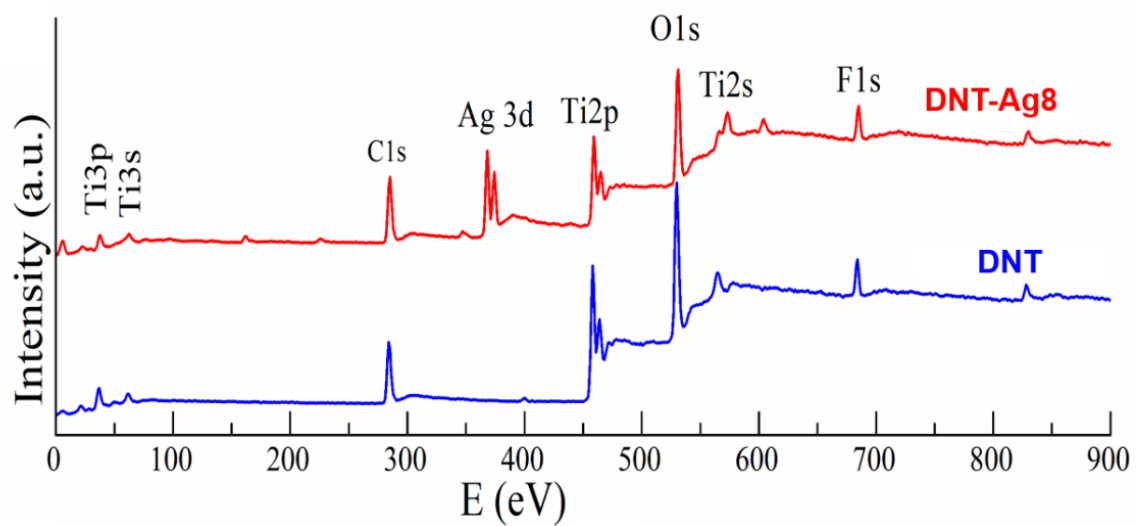

**Fig. S8.** Micro-CT 3D reconstruction perspective view on the top of the implant at 12 weeks after implantation.

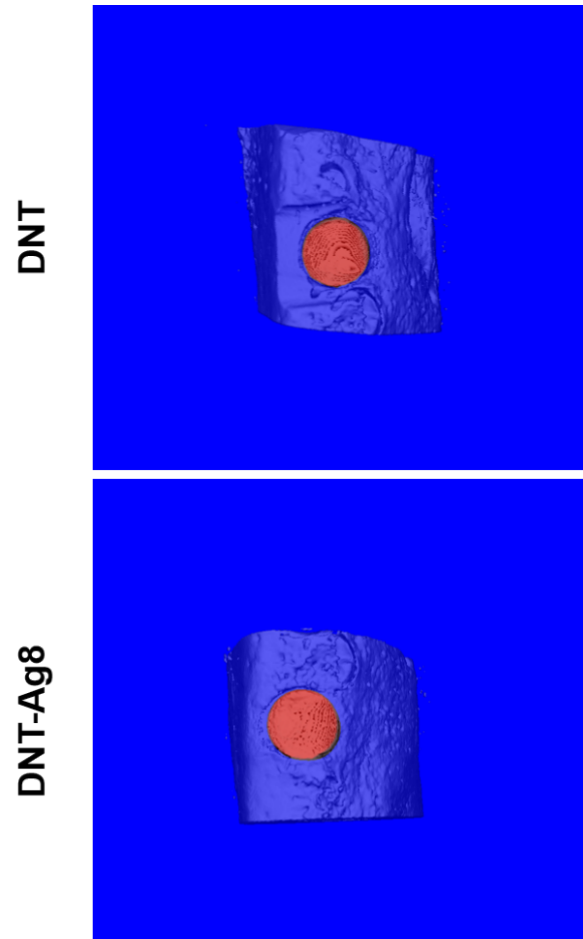

**Table S1.** The chemical compositions of the DNT and DNT-Ag8 by EDS.

| %       | Ti   | O    | F   | C   | Ag  |
|---------|------|------|-----|-----|-----|
| DNT     | 71.0 | 22.6 | 4.9 | 1.5 | 0   |
| DNT-Ag8 | 67.6 | 24.3 | 7.8 | 0   | 0.3 |
